# Supplementary material for: Evaluation of guidelines regarding surgical treatment of breast cancer using the AGREE Instrument: a systematic review
Source: PubMed Central journal article supplement — BMJ Open. 2017 Nov 14;7(11):e014883. doi: 10.1136/bmjopen-2016-014883 (PMC5695453; doi:10.1136/bmjopen-2016-014883), 2017-11-14
Supplement: bmjopen-2016-014883supp001.pdf [file bmjopen-2016-014883supp001.pdf]

## Supplementary File 1

### Pubmed search strategy

1. breast cancer[Title/Abstract] OR breast tumor[Title/Abstract] OR breast carcinoma[Title/Abstract] OR breast neoplasm[Title/Abstract] OR primary breast cancer[Title/Abstract] OR locally advanced breast cancer[Title/Abstract] OR early breast cancer[Title/Abstract]))
2. invasive breast cancer[Title/Abstract] OR invasive ductal cancer[Title/Abstract] OR invasive lobuar cancer[Title/Abstract] OR ductal carcinoma in situ[Title/Abstract] OR DICS[Title/Abstract] OR axillary lymph node[Title/Abstract]))
3. surgery[Title/Abstract] OR surgical treatment[Title/Abstract] OR surgical management[Title/Abstract] OR operations OR locoregional [Title/Abstract] OR local[Title/Abstract] OR sentinel lymph node[Title/Abstract] OR SLNB[Title/Abstract] OR ALND[Title/Abstract] OR margin[Title/Abstract] OR mastectomy[Title/Abstract] OR lumpectomy[Title/Abstract] OR breast conserving surgery[Title/Abstract] OR breast conservation surgery[Title/Abstract]))
4. guideline[Title/Abstract] OR consensus[Title/Abstract] OR recommendation[Title/Abstract]))
5. #1 AND #4 OR #2 AND #4 OR #3 AND #4
6. #1 AND #2 AND #4 OR #1 AND #3 AND #4 OR #2 AND #3 AND #4
7. #1 AND #2 AND # 3 AND #4
8. #5 OR #6 OR #7
9. "2009"[Date - Publication] : "2016"[Date - Publication]
10. English[Language]
11. #8 AND #9 AND #10
