# Supplementary material for: Evaluation of guidelines regarding surgical treatment of breast cancer using the AGREE Instrument: a systematic review
Source: PubMed Central journal article supplement — BMJ Open. 2017 Nov 14;7(11):e014883. doi: 10.1136/bmjopen-2016-014883 (PMC5695453; doi:10.1136/bmjopen-2016-014883), 2017-11-14
Supplement: bmjopen-2016-014883supp002.pdf [file bmjopen-2016-014883supp002.pdf]

**Supplementary Table 1, Websites of the included CPGs/Consensus**

| <b>Name</b> | <b>Link</b>                                                                                                                                                      | <b>Country</b> |
|-------------|------------------------------------------------------------------------------------------------------------------------------------------------------------------|----------------|
| ESMO        | <a href="http://www.esmo.org/Guidelines/Breast-Cancer/Primary-Breast-Cancer">www.esmo.org/Guidelines/Breast-Cancer/Primary-Breast-Cancer</a>                     | Europe         |
| NCCN        | <a href="http://www.nccn.org/professionals/physician_gls/pdf/breast.pdf">www.nccn.org/professionals/physician_gls/pdf/breast.pdf</a>                             | United States  |
| JBCS        | <a href="http://www.jbcs.gr.jp/english_new/index.html">www.jbcs.gr.jp/english_new/index.html</a>                                                                 | Japan          |
| AGO         | <a href="http://www.ago-online.de/en/guidelines-mamma/march-2015/">www.ago-online.de/en/guidelines-mamma/march-2015/</a>                                         | German         |
| NICE        | <a href="http://www.nice.org.uk/guidance/published?type=cg">www.nice.org.uk/guidance/published?type=cg</a>                                                       | United Kingdom |
| CCO         | <a href="http://www.cancercare.on.ca/toolbox/qualityguidelines/diseasesite/breast-ebc">www.cancercare.on.ca/toolbox/qualityguidelines/diseasesite/breast-ebc</a> | Canada         |
| SIGN        | <a href="http://www.sign.ac.uk">www.sign.ac.uk</a>                                                                                                               | Scotland, UK   |
| NZGG        | <a href="http://www.nzgg.org.nz">www.nzgg.org.nz</a>                                                                                                             | New Zealand    |
| KCE         | <a href="http://kce.fgov.be/content/about-copyrights-for-kce-reports">kce.fgov.be/content/about-copyrights-for-kce-reports</a>                                   | Belgium        |
| CA-BRCA     | <a href="http://canceraustralia.gov.au/clinical-best-practice/breast-cancer">canceraustralia.gov.au/clinical-best-practice/breast-cancer</a>                     | Australia      |
| SASK        | <a href="http://www.saskcancer.ca/">www.saskcancer.ca/</a>                                                                                                       | Canada         |
| Malaysia    | <a href="http://www.acadmed.org.my/index.cfm">http://www.acadmed.org.my/index.cfm</a>                                                                            | Malaysia       |
