# Supplementary material for: Evaluation of guidelines regarding surgical treatment of breast cancer using the AGREE Instrument: a systematic review
Source: PubMed Central journal article supplement — BMJ Open. 2017 Nov 14;7(11):e014883. doi: 10.1136/bmjopen-2016-014883 (PMC5695453; doi:10.1136/bmjopen-2016-014883), 2017-11-14
Supplement: bmjopen-2016-014883supp003.pdf [file bmjopen-2016-014883supp003.pdf]

---

**Supplementary Table 2.1 ICC among 3 reviewers for each CPGs/Consensus included**

---

| <b>Guidelines</b> | <b>ICC</b> |
|-------------------|------------|
| ESMO              | 0.94       |
| NCCN              | 0.99       |
| JBCS              | 0.93       |
| ASCO              | 0.97       |
| AGO               | 0.96       |
| NICE              | 0.98       |
| CCO               | 0.98       |
| SIGN              | 0.99       |
| NZGG              | 0.96       |
| ACR               | 0.98       |
| KCE               | 0.98       |
| SSO-ASTRO         | 0.99       |
| SEOM              | 0.98       |
| EUSOMA            | 0.90       |
| CA-NBOCC          | 0.97       |
| CA -BRCA          | 0.98       |
| SASK              | 0.96       |
| Malaysia          | 0.98       |
| SIOG              | 0.98       |
| D.A.C.H           | 0.99       |
| St Gallen         | 0.95       |
| ESO               | 0.97       |
| Biedenkopf,       | 0.95       |

---

Within each CPGs/Consensus statements, we used the ICC to measure the domain score rating agreement among three reviewers. An average ICC was calculated for each CPGs/Consensus statements, as a reflection of the consistency of agreement for different domains.

---
