# Supplementary material for: Evaluation of guidelines regarding surgical treatment of breast cancer using the AGREE Instrument: a systematic review
Source: PubMed Central journal article supplement — BMJ Open. 2017 Nov 14;7(11):e014883. doi: 10.1136/bmjopen-2016-014883 (PMC5695453; doi:10.1136/bmjopen-2016-014883), 2017-11-14
Supplement: bmjopen-2016-014883supp004.pdf [file bmjopen-2016-014883supp004.pdf]

---

**Supplementary Table 2.2 ICC among 3 reviewers for each domain of AGREE II**

---

| <b>Domain</b>            | <b>ICC</b> |
|--------------------------|------------|
| Scope and purpose        | 0.82       |
| Stakeholder involvement  | 0.96       |
| Rigour of development    | 0.96       |
| Clarity and presentation | 0.84       |
| Applicability            | 0.87       |
| Editorial independence   | 0.88       |

For each domain of AGREE II, we used the ICC to measure the domain score rating agreement among three reviewers. An average ICC was calculated for each domain, as a reflection of the consistency of agreement for different CPGs/Consensus.

---
